# Supplementary material
Source: PubMed Central journal article supplement (PMC9946025)
Supplement: media-1.pdf [file media-1.pdf]

# Membrane free-energy landscapes derived from atomistic dynamics explain nonuniversal cholesterol-induced stiffening – Supplementary Information

Giacomo Fiorin, Lucy R. Forrest and José D. Faraldo-Gómez

|                                  | MD, bending<br>fluctuations (this work) |         |        | MD, tilt<br>fluctuations [1]    |        | X-ray<br>diffraction [2] |                      |
|----------------------------------|-----------------------------------------|---------|--------|---------------------------------|--------|--------------------------|----------------------|
| POPC                             |                                         |         |        |                                 |        |                          |                      |
| $k_c$ (kcal/mol)                 | 17.0                                    | [13.5,  | 22.1]  | 19.1                            | [17.9, | 20.3]                    | 11.9 [9.3, 14.5]     |
| $k_t$ (kcal/mol/Å <sup>2</sup> ) | 0.102                                   | [0.084, | 0.127] | 0.079                           |        |                          | 0.099 [0.051, 0.147] |
| POPC/CHOL                        |                                         |         |        |                                 |        |                          |                      |
| $k_c$ (kcal/mol)                 | 44.4                                    | [23.7,  | 99.8]  | <b>**<math>P = 0.002</math></b> |        |                          |                      |
| $k_t$ (kcal/mol/Å <sup>2</sup> ) | 0.085                                   | [0.072, | 0.101] | $P = 0.16$                      |        |                          |                      |
| DOPC                             |                                         |         |        |                                 |        |                          |                      |
| $k_c$ (kcal/mol)                 | 18.0                                    | [13.0,  | 26.2]  | 17.1                            | [15.9, | 18.3]                    | 11.6 [10.8, 12.4]    |
| $k_t$ (kcal/mol/Å <sup>2</sup> ) | 0.103                                   | [0.080, | 0.138] | 0.092                           |        |                          | 0.128 [0.116, 0.140] |
| DOPC/CHOL                        |                                         |         |        |                                 |        |                          |                      |
| $k_c$ (kcal/mol)                 | 28.5                                    | [16.0,  | 60.3]  | $P = 0.24$                      |        |                          |                      |
| $k_t$ (kcal/mol/Å <sup>2</sup> ) | 0.081                                   | [0.064, | 0.106] | $P = 0.20$                      |        |                          |                      |

**Table S1:** Bending moduli  $k_c$  and tilt moduli  $k_t$  estimated from membrane bending fluctuations. The estimated mean of each parameter, obtained by fitting Eq. 5 against the data, is reported along with the corresponding 95% confidence interval (CI) in brackets. Bending fluctuation results are from this work (Fig. 7), with uncertainty estimated by parametric bootstrapping [3]. The same distributions were used to perform statistical tests against the hypothesis that cholesterol has no effect, with the resulting  $P$ -values reported in the table. Also reported are previous results for the pure lipids using tilt fluctuations [1] and X-ray diffraction [2], with 95% CIs calculated from the reported standard errors, if available.

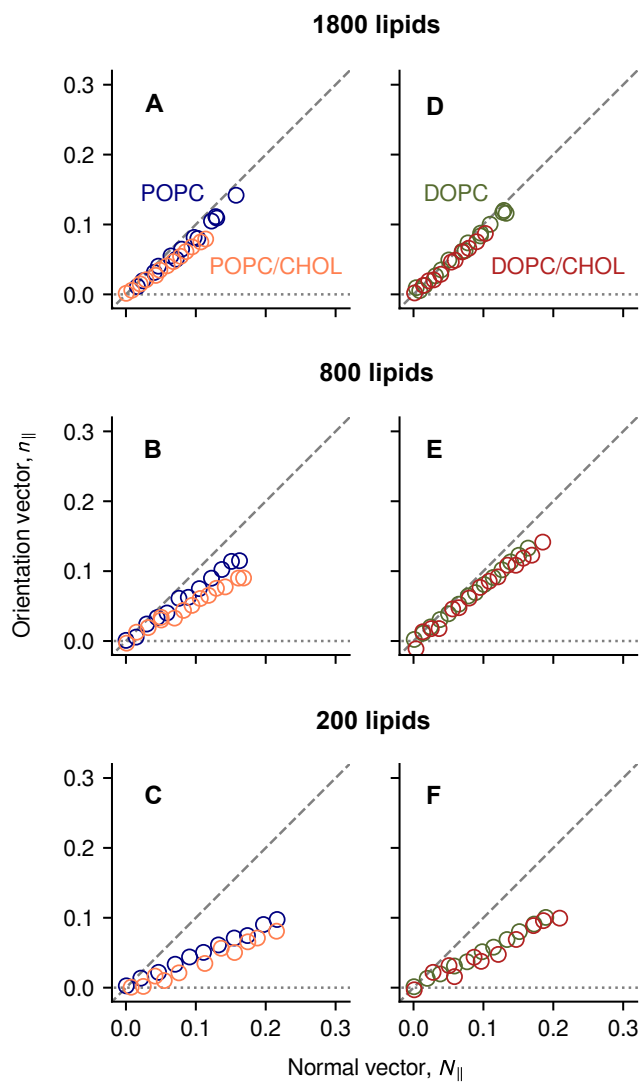

**Figure S1:** Change in lipid orientation as a function of curvature. The longitudinal component of the mean lipid orientation vector  $n_{\parallel}$  was regressed onto the longitudinal component of the membrane normal vector,  $N_{\parallel}$ . Based on this regression, the value of  $n_{\parallel}$  corresponding to the largest value of  $N_{\parallel}$  in each bilayer is plotted for each umbrella-sampling simulation window. Grey dashed lines indicate the Helfrich-Canham theoretical prediction ( $n_{\parallel} = N_{\parallel}$ ); dotted lines indicate no changes in lipid orientation ( $n_{\parallel} = 0$ ). Results are shown for POPC and POPC/CHOL bilayers (A-C) and DOPC and DOPC/CHOL bilayers (D-F). The values of the regression slopes are plotted in Fig. 3D,E and Fig. S2.

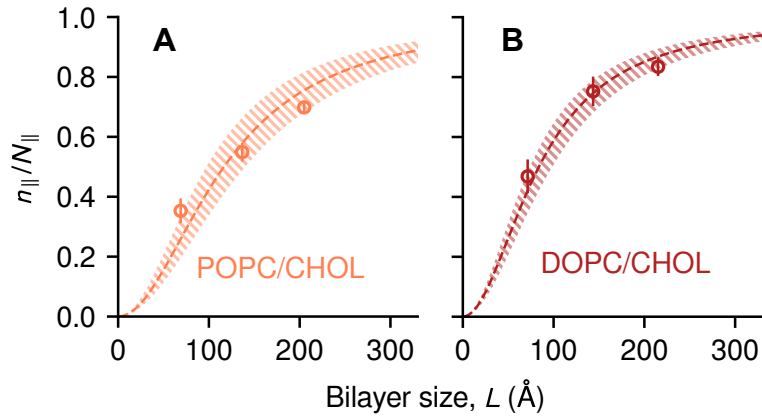

**Figure S2:** Analysis of the balance between bending and tilt energies for mixed bilayers. The expression in Eq. 3 is fitted against the values of  $n_{\parallel}/N_{\parallel}$  for POPC/CHOL (A) and DOPC/CHOL bilayers (B), using  $k_c/k_t$  as the single fitting parameter. Dashed lines indicate best-fit curves, and striped bands the 95% CI around each curve.

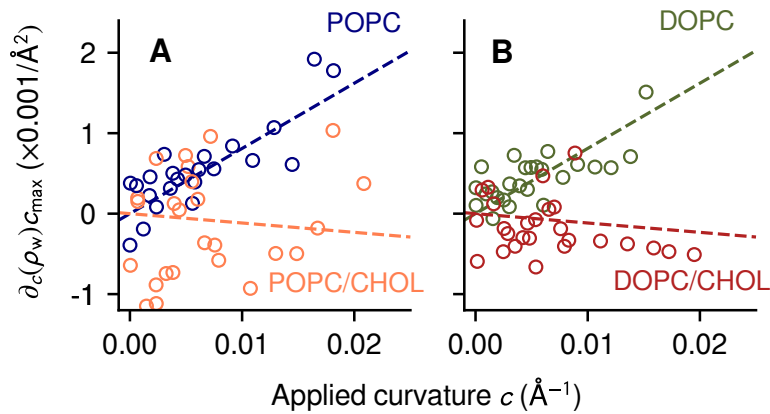

**Figure S3:** Changes in number of water molecules  $\rho_w$  embedded in the hydrophobic section of each bilayer quantified for POPC and POPC/CHOL (A), and DOPC and DOPC/CHOL (B). Dashed lines indicate the results of linear fits of  $\Delta\rho_w$  vs. the curvature  $c$ , performed on aggregated data from POPC and DOPC (slope =  $0.081 \pm 0.005 \text{ \AA}^{-2}$ ) or from POPC/CHOL and DOPC/CHOL (slope =  $-0.011 \pm 0.009 \text{ \AA}^{-2}$ ). No significant differences were detected between POPC and DOPC or between POPC/CHOL and DOPC/CHOL.

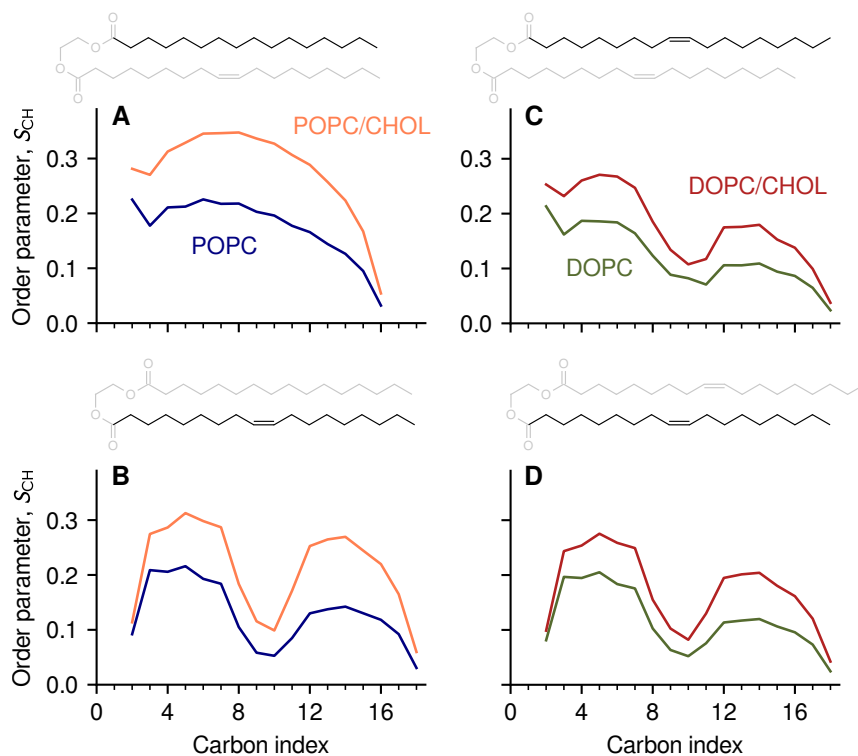

**Figure S4:** Atomic order parameters  $S_{CH}$  between acyl chain carbons and their bound hydrogens, computed as a function of the carbon atom's position along each chain. Results are shown for the *sn*-1 (A) and *sn*-2 chain (B) of POPC molecules, and for the *sn*-1 and *sn*-2 chains of DOPC molecules (C-D). The chemical structure of each chain is shown alongside the order parameters' values with the same scale.

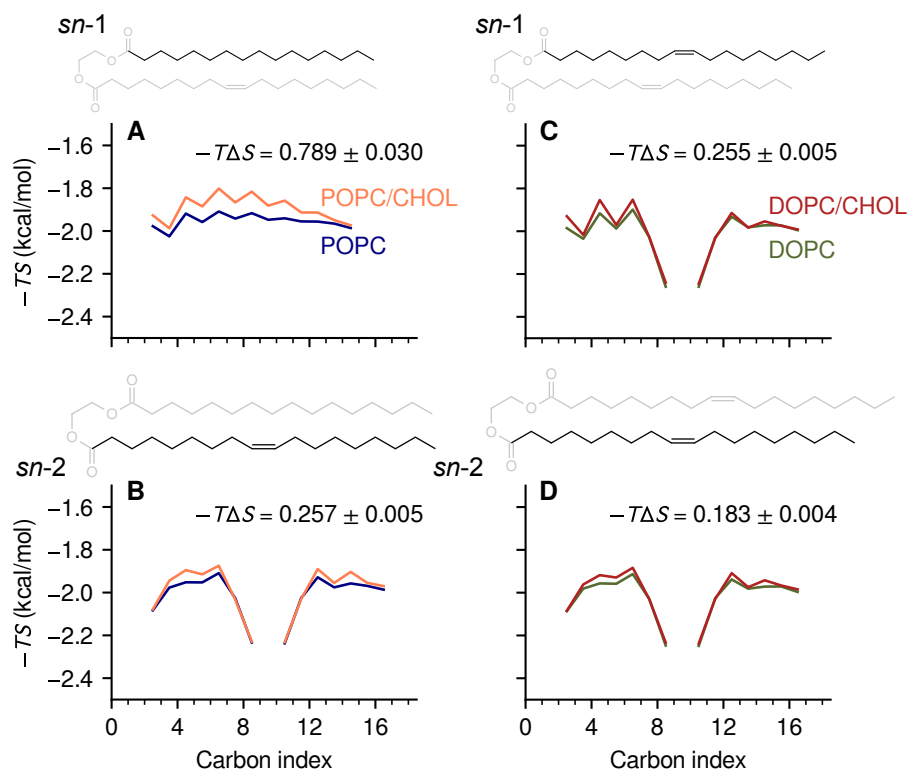

**Figure S5:** Entropy of lipid acyl chains, extracted from histograms of the torsional angles of carbon atoms with a spacing of  $5^\circ$ . The chemical structure of each acyl chain is shown alongside the reported entropy values as a function of the position along the chain of the second carbon atom of the torsional angle. Entropy values are shown as free-energy contributions,  $-TS$ , in kcal/mol units. Results are shown for the *sn*-1 (A) and *sn*-2 chain (B) of POPC molecules, for the *sn*-1 and *sn*-2 chains of DOPC molecules (C-D). For each chain, the aggregated change  $\langle -T\Delta S \rangle$  upon adding cholesterol is also reported in the panel (in kcal/mol units).

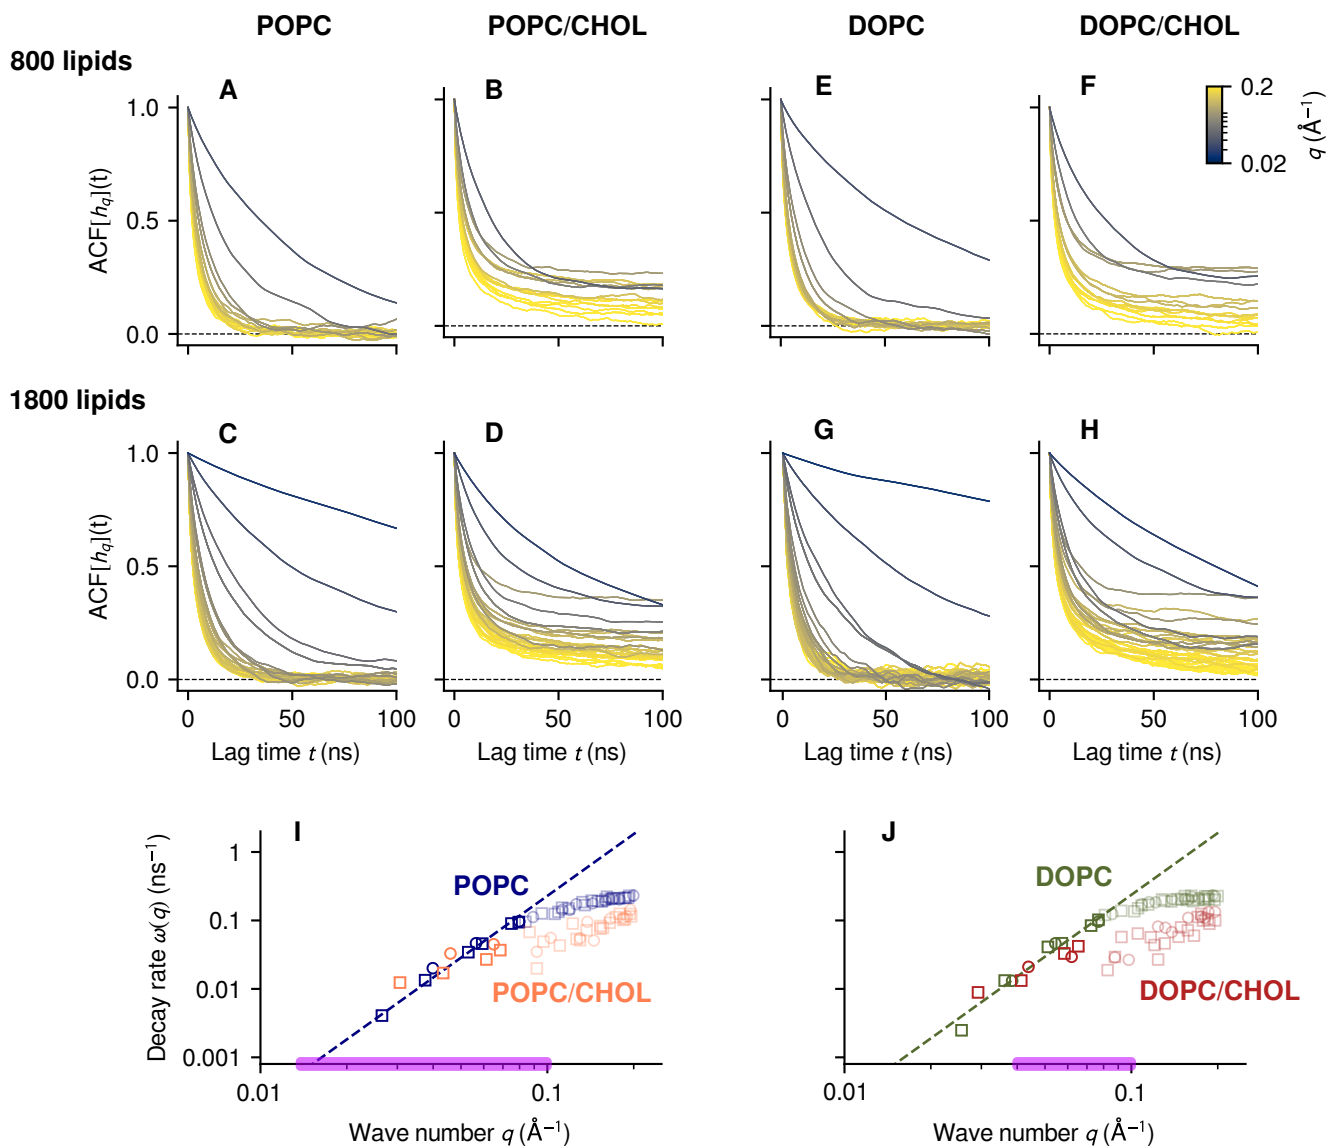

**Figure S6:** (A-H) Auto-correlation functions (ACFs) of the bending Fourier coefficients  $h_q$  for multiple bilayers, colored according to the value of  $q$  as in the scale shown. (I,J) Decay rates  $\omega(q)$ , obtained by fitting ACFs to single exponentials, for POPC (blue), POPC/CHOL (orange), DOPC (green) and DOPC/CHOL (red). Decay rates from 800-lipid and 1800-lipid bilayers are shown as circles and squares, respectively; values for  $q > 0.08 \text{ \AA}^{-1}$  are shown in transparent colors. Dashed lines indicate a linear fit for DOPC and POPC of  $\omega(q)$  vs.  $q^3$  as predicted by dynamic theories [4, 5, 6, 7] based on the Helfrich-Canham model [8, 9]. The intervals of  $q$  where NSE experiments were carried out [10, 11] are highlighted in purple.

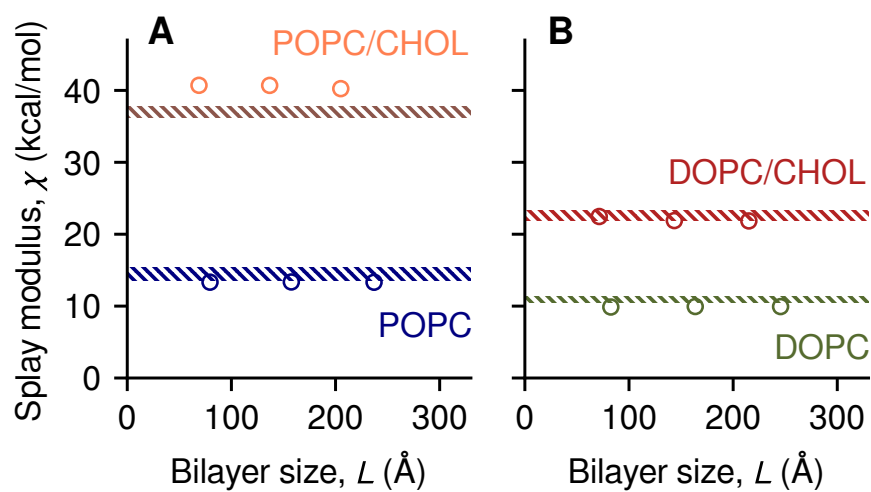

**Figure S7:** Lipid splay modulus  $\chi$  computed from fluctuations of the mutual angles  $\mathbf{n}_i \cdot \mathbf{n}_j$  between orientation vectors of lipid molecules [12]. (A) Values of  $\chi$  for POPC (blue) and POPC/CHOL (orange) bilayers shown as circles; dashed bands areas indicate the 95% CIs of literature values [12]; because no values for POPC/CHOL were reported, data for the similar mixture POPC/POPS/CHOL 34:30:36 [12] are shown in brown. (B) Values of  $\chi$  for DOPC and DOPC/CHOL, compared to published 95% CIs [11].

## References

- [1] Venable RM, Brown FLH, Pastor RW, Mechanical properties of lipid bilayers from molecular dynamics simulation. *Chem. Phys. Lipids* **192**, 60–74 (2015).
- [2] Nagle JF, Experimentally determined tilt and bending moduli of single-component lipid bilayers. *Chem. Phys. Lipids* **205**, 18–24 (2017).
- [3] Ergüder MF, Deserno M, Identifying systematic errors in a power spectral analysis of simulated lipid membranes. *J. Chem. Phys.* **154**, 214103 (2021).
- [4] Messenger R, Bassereau P, Porte G, Dynamics of the undulation mode in swollen lamellar phases. *J. Phys.* **51**, 1329–1340 (1990).
- [5] Seifert U, Langer SA, Viscous modes of fluid bilayer membranes. *Europhys. Lett.* **23**, 71–76 (1993).
- [6] Zilman AG, Granek R, Undulations and dynamic structure factor of membranes. *Phys. Rev. Lett.* **77**, 4788–4791 (1996).
- [7] Watson MC, Peng Y, Zheng Y, Brown FLH, The intermediate scattering function for lipid bilayer membranes: From nanometers to microns. *J. Chem. Phys.* **135**, 194701 (2011).
- [8] Canham P, The minimum energy of bending as a possible explanation of the biconcave shape of the human red blood cell. *J. Theoret. Biol.* **26**, 61–81 (1970).
- [9] Helfrich W, Elastic properties of lipid bilayers: theory and possible experiments. *Z. Naturforsch. C* **28**, 693–703 (1973).
- [10] Arriaga LR, et al., Stiffening effect of cholesterol on disordered lipid phases: A combined neutron spin echo + dynamic light scattering analysis of the bending elasticity of large unilamellar vesicles. *Biophys. J.* **96**, 3629–3637 (2009).
- [11] Chakraborty S, et al., How cholesterol stiffens unsaturated lipid membranes. *Proc. Natl. Acad. Sci. USA* **117**, 21896–21905 (2020).
- [12] Doktorova M, Harries D, Khelashvili G, Determination of bending rigidity and tilt modulus of lipid membranes from real-space fluctuation analysis of molecular dynamics simulations. *Phys. Chem. Chem. Phys.* **19**, 16806–16818 (2017).
